# Supplementary material
Source: publisher site journal article supplement (https://www.dovepress.com/get_supplementary_file.php?f=395920.xlsx)
Supplement: Supplementary file 1 [file get_supplementary_file.php]

## Sheet: Sheet1
The antibiotic susceptibilities of 22 carbapenem-resistant Klebsiella pneumoniae strains (units：μg/mL)
Strain	Ampicillin	Gentamicin	Cefazolin	Amikacin	Amoxicillin/Clavulanate	Ampicillin/Sulbactam	Trimethoprim/Sulfamethoxazole	Ciprofloxacin	Meropenem	Piperacillin/Tazobactam	Cefepime	Cefotaxime	Imipenem	Levofloxacin	Aztreonam	Moxifloxacin	Tetracycline	Ceftazidime
BJ19-0001	>16	>8	>16	>32	>16/8	>16/8	>2/38	>2	>8	>64/4	>16	> 32	>8	>8	>16	>4	>8	>16
BJ19-0002	>16	>8	>16	<=8	>16/8	>16/8	>2/38	>2	>8	>64/4.	>16	>32	>8	>8	>16	>4	>8	>16
BJ19-0003	>16.	>8	>16	<=8	> 16/8	>16/8	>2/38	>2	>8	>64/4	>16	>32	>8	>8	>16	>4	>8	>16
BJ19-0004	>16	>8	>16	>32	>16/8	> 16/8	>2/38	>2	>8	>64/4	>16	>32	>8	>8	>16	>4	>8	>16
BJ19-0005	>16	>8	>16	>32	>16/8	>16/8	>2/38	>2	>8	>64/4	>16	>32	>8	>8	>16	>4	>8	>16
BJ19-0007	>16	>8	>16	>32	>16/8	>16/8	<=0.5/9.5	>2	>8	>64/4	>16	>32	>8	>8	>16	>4	>8	>16
BJ19-0008	>16	<=2	>16	<=8	>16/8	>16/8	>2/38	>2	>8	>64/4	>16	>32	>8	>8	>16	>4	>8	>16
BJ19-0009	>16	>8	>16	<=8	>16/8	>16/8	>2/38	>2	>8	>64/4	>16	>32	>8	>8	>1 6	>4	>8	>16
BJ19-0010	>16	>8	>16	<=8	>16/8	>16/8	>2/38	>2	>8	>64/4	>16	>32，	>8	>8	>16	>4	>8	>16
BJ19-0011	>16	>8	>16	<=8	>16/8	>16/8	>2/38	>2	>8	>64/4	> 16	>32	>8	>8	>16	>4	>8	>16
BJ19-0012	>16	>8	>16	<=8	>16/8	>16/8	>2/38	2	>8	>64/4	>16	>32	>8	<=1	16	4	>8	>16
BJ19-0013	>16	>8	>16	<=8	>16/8	>16/8	>2/38	<=0.5	>8	>64/4	>16	>32	>8	<=1	16	2	>8	>16
BJ19-0014	>16	8	>16	>32	>16/8	> 16/8	<=0.5/9.5	>2	>8	>64/4	>16	>32	>8	>8	>16	>4	4	>16
BJ19-0015	>16	>8	>16	<=8	>16/8	>16/8	>2/38	>2	>8	>64/4	>16	>32	8	>8	>16	>4	>8	>16
BJ19-0016	>16	>8	>16	>32	>16/8	>16/8	<= 0.5/9.5	>2	>8	>64/4	>16	>32	>8	>8	>16.	>4	4	>16
BJ19-0017	>16	>8	>16	<=8	>16/8	>16/8	<=0.5/9.5	>2	>8	>64/4	>16	>32	>8	8	>16	>4	<= 2	>16
BJ19-0018	>16	>8	> 16	>32	>16/8	> 16/8	>2/38	>2	>8	>64/4	>16	>32	>8	>8	>16	>4	>8	>16
BJ19-0019	>16	>8	>16	<=8	>16/8	>16/8	>2/38	>2	>8	>64/4	>16.	>32	>8	>8	>16	>4	>8	>16
BJ19-0020	>16	>8	>16	<=8	>16/8 .	>16/8	>2/38	>2	>8	>64/4	>16	>32	>8	>8	> 16	>4	>8	>16
BJ19-0021	>16.	>8	>16	<=8	>16/8	> 16/8	<=0.5/9.5	>2	>8	>64/4	>16	>32	>8	8	>16	>4	<=2	>16
BJ19-0022	>16	>8	>16	>32	> 16/8	>16/8	> 2/38	>2	>8	>64/4	>16	>32	>8	>8	>16	>4	>8	>16
BJ19-0023	>16	<= 2	>16	<= 8	>16/8	>16/8	<=0.5/9.5	>2	>8	>64/4	>16	>32	>8	>8	>16	>4	4	>16
BJ19-0024	>16	<=2	>16	<=8	>16/8	>16/8	<=0.5/9.5	>2	>8	>64/4	>16	>32	>8	>8	>16.	>4	4	>16
BJ19-0025	>16	>8	>16	<=8	>16/8	> 16/8	> 2/38	>2	>8	>64/4	>16	>32	8	>8	>16	>4	>8	>16
